# Supplementary material for: In situ growth of polyimide nanoarrays on conductive carbon supports for high-rate charge storage and long-lived metal-free cathodes
Source: Royal Society of Chemistry journal article supplement (doi:10.1039/d1ta00302j), 2021-01-01
Supplement: d1ta00302j1.pdf [file d1ta00302j1.pdf]

## Supporting Information

### **In-situ growth of polyimide nanoarrays onto conductive carbon supports for high-rate charge storage and long-lived metal-free cathodes**

Qing Zhang,<sup>‡ a,c</sup> Yi He,<sup>‡a</sup> Guanyu Lin,<sup>‡a</sup> Xiaolan Ma,<sup>b</sup> Zongying Xiao,<sup>a</sup> Dean Shi<sup>c</sup> and Yingkui Yang<sup>\*a,b</sup>

<sup>a</sup> Key Laboratory of Catalysis and Energy Materials Chemistry of Ministry of Education & Hubei Key Laboratory of Catalysis and Materials Science, South-Central University for Nationalities, Wuhan 430074, China. E-mail: [ykyang@mail.scuec.edu.cn](mailto:ykyang@mail.scuec.edu.cn)

<sup>b</sup> Hubei Engineering Technology Research Centre of Energy Polymer Materials, School of Chemistry and Materials Science, South-Central University for Nationalities, Wuhan 430074, China.

<sup>c</sup> Ministry-of-Education Key Laboratory for Green Preparation and Application of Functional Materials, School of Materials Science and Engineering, Hubei University, Wuhan 430074, China.

<sup>‡</sup> The authors contributed equally to this work.

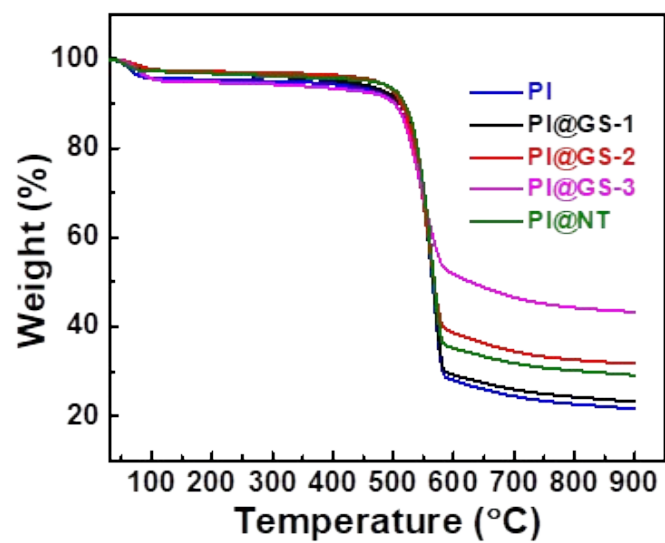

Fig. S1. TGA curves of pure PI, PI@GS, and PI@NT composites.

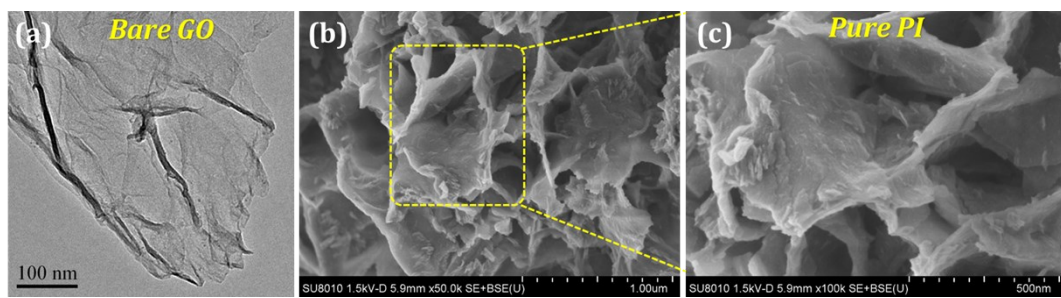

**Fig. S2.** (a) TEM of bare GO and (b, c) SEM images of pure PI.

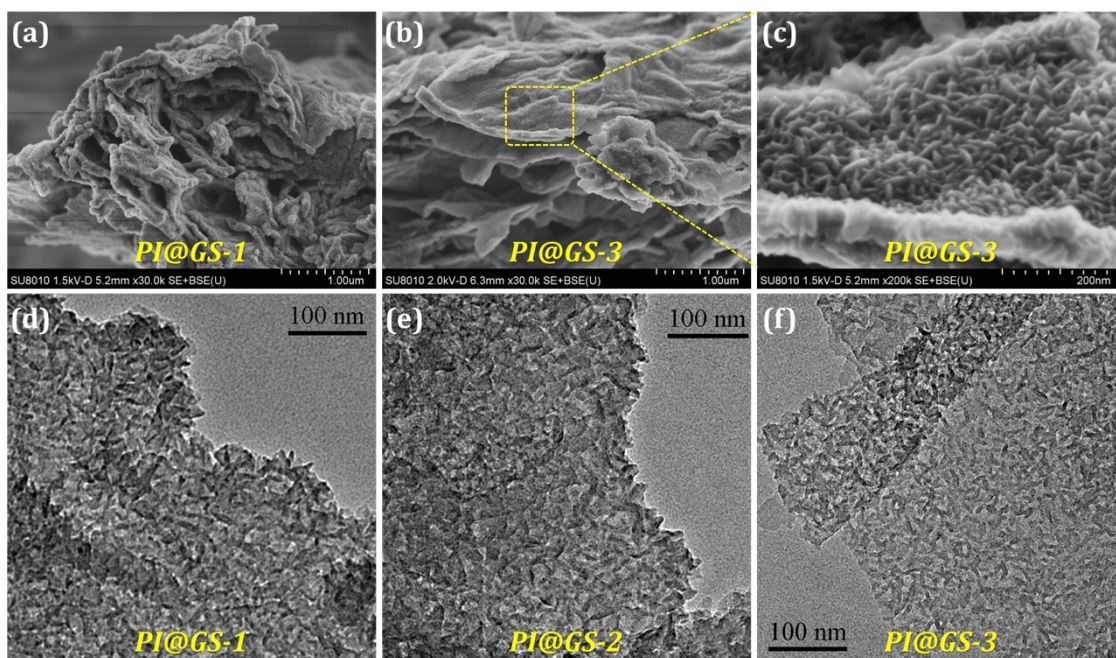

**Fig. S3.** SEM (a-c) and TEM (d-f) images of PI@GS composites.

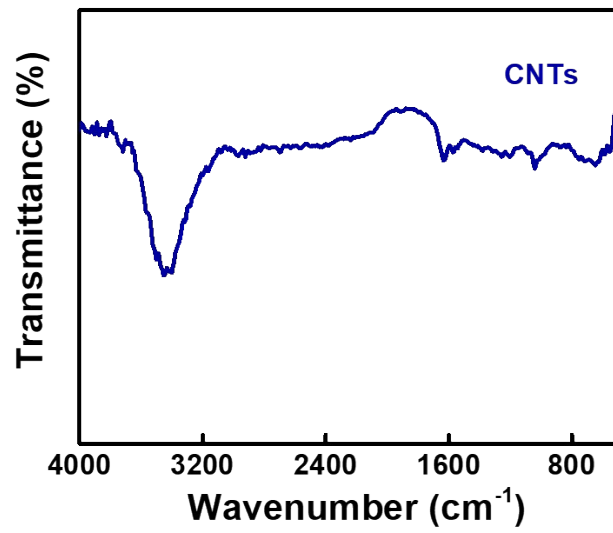

Fig. S4. FT-IR spectrum of acid-treated CNTs.

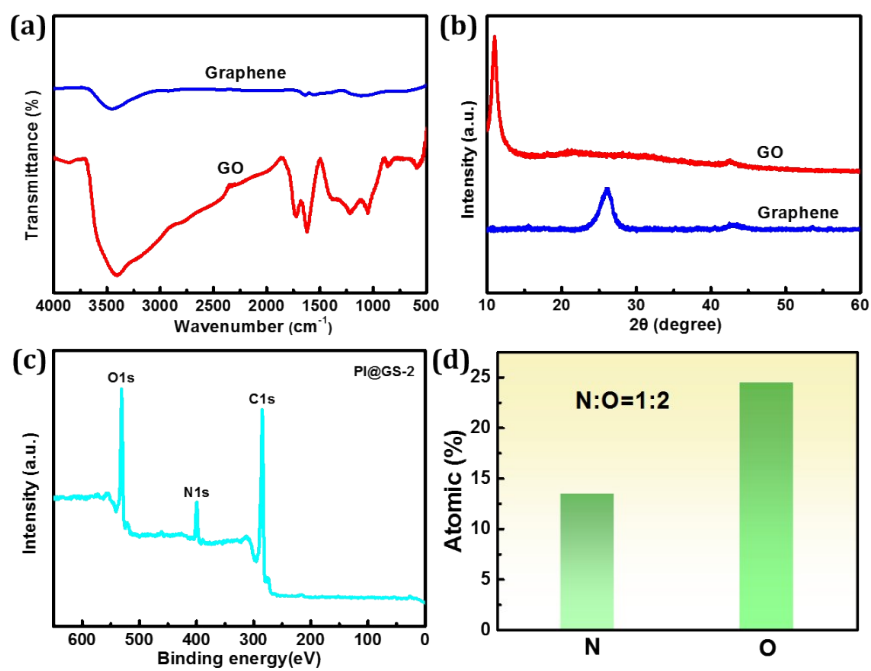

**Fig. S5.** (a) FT-IR spectra and (b) XRD patterns of GO and graphene, (c) typical XPS survey spectrum and (d) EDS of PI@GS-2.

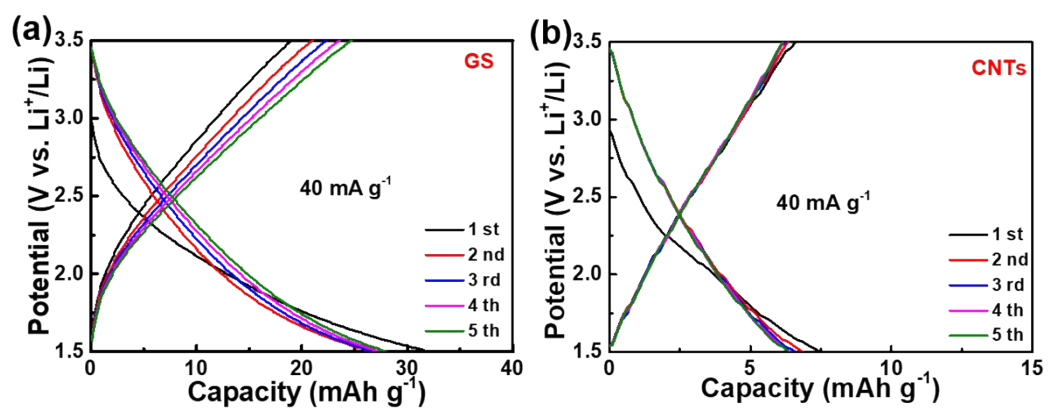

Fig. S6. The capacity contribution of GS and CNTs for LIBs.

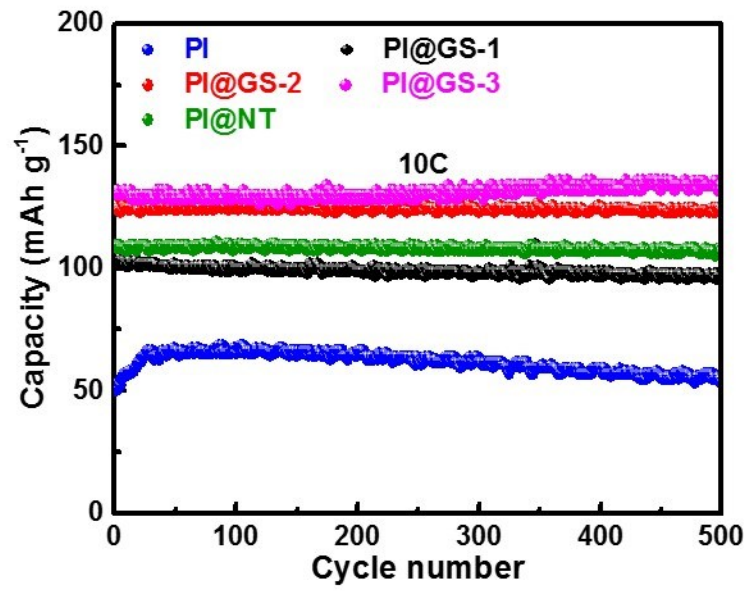

**Fig. S7.** Cycling performances of coin-type Li/LiTFSI/PI, Li/LiTFSI/PI@GS, and Li/LiTFSI/PI@NT cells at 10C over 500 cycles.



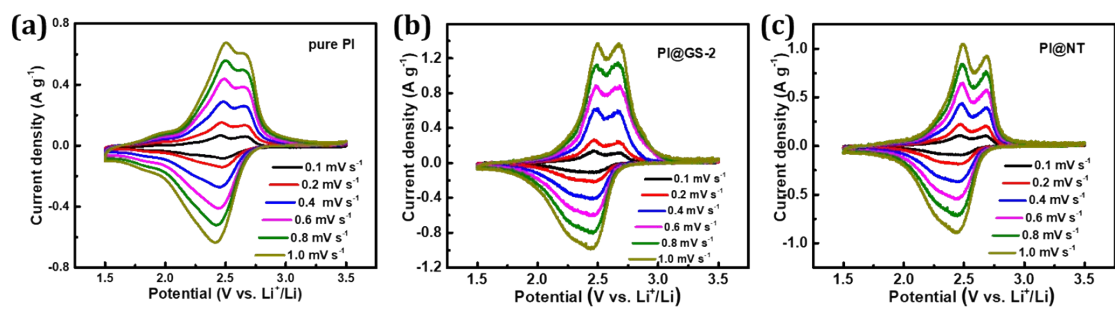

**Fig. S8.** CV curves of (a) pure PI, (b) PI@GS-2, and (c) PI@NT cathodes at sweep rates of 0.1 to 1.0 mV s<sup>-1</sup>.

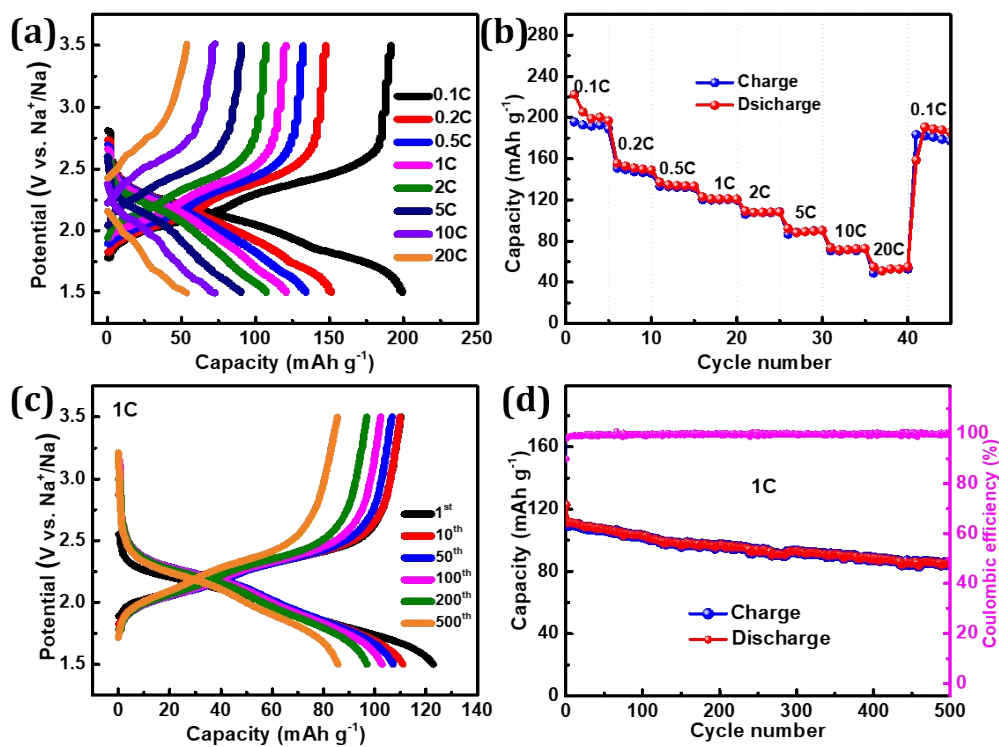

**Fig. S9. Na-ion storage performance of Na/NaPF<sub>6</sub>/PI@GS-2 cells:** (a) charge/discharge curves and (b) rate performance measured in the rate range of 0.1C to 20 C, (c) charge/discharge curves at different cycles and (d) cycling stability measured at 1C for 500 cycles.

**Table S1.** The comparison of reported carbonyl polymers for LIB cathodes.

| Materials                                                                                              | Theoretical capacity (mAh g <sup>-1</sup> ) | Practical (Initial) capacity (mAh g <sup>-1</sup> ), rate | Ratecapacity (mAh g <sup>-1</sup> ), rate | Capacity (mAh g <sup>-1</sup> ), cycle numbers, rate | Ref.                 |
|--------------------------------------------------------------------------------------------------------|---------------------------------------------|-----------------------------------------------------------|-------------------------------------------|------------------------------------------------------|----------------------|
| 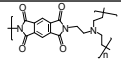                      | 343<br>(4e)                                 | 160<br>38.3 mA g <sup>-1</sup>                            | 74<br>3.83 A g <sup>-1</sup>              | 147<br>200<br>191.5 mA g <sup>-1</sup>               | 1                    |
|                       | 443<br>(4e)                                 | 175<br>0.1C                                               | 101<br>2C                                 | 101<br>150<br>0.5C                                   | 2                    |
|                       | 367<br>(4e)                                 | 127.3<br>20 mA g <sup>-1</sup>                            | 108<br>500 mA g <sup>-1</sup>             | 121<br>60<br>50 mA g <sup>-1</sup>                   | 3                    |
|                       | 245<br>(4e)                                 | 125<br>25 mA g <sup>-1</sup>                              | 86<br>250 mA g <sup>-1</sup>              | 77.6<br>100<br>250 mA g <sup>-1</sup>                | 4                    |
|                       | 322<br>(5e)                                 | 80<br>50 mA g <sup>-1</sup>                               | 95<br>200 mA g <sup>-1</sup>              | 130<br>50<br>50 mA g <sup>-1</sup>                   | 5                    |
|                       | 276<br>(4e)                                 | 130<br>50 mA g <sup>-1</sup>                              | 98<br>200 mA g <sup>-1</sup>              | 110<br>50<br>50 mA g <sup>-1</sup>                   | 5                    |
|                     | 257<br>(4e)                                 | 85<br>50 mA g <sup>-1</sup>                               | 0<br>200 mA g <sup>-1</sup>               | 75<br>50<br>50 mA g <sup>-1</sup>                    | 5                    |
|                     | 225<br>(2e)                                 | 156<br>0.1C                                               | 102<br>20C                                | 132<br>1000<br>0.5C                                  | 6                    |
| <br><b>Graphene</b> | <b>367<br/>(4e)</b>                         | <b>165<br/>0.1C</b>                                       | <b>125<br/>20C</b>                        | <b>112 (88%)<br/>5000<br/>5C</b>                     | <b>This<br/>work</b> |

## References

1. H. Wu, Q. Meng, Q. Yang, M. Zhang, K. Lu and Z. Wei, *Adv. Mater.*, 2015, **27**, 6504-6510.
2. Y. Meng, H. Wu, Y. Zhang and Z. Wei, *J. Mater. Chem. A*, 2014, **2**, 10842-10846.
3. C. Chen, X. Zhao, H.-B. Li, F. Gan, J. Zhang, J. Dong and Q. Zhang, *Electrochim. Acta*, 2017, **229**, 387-395.
4. G. Hernández, M. Salsamendi, S. M. Morozova, E. I. Lozinskaya, S. Devaraj, Y. S. Vygodskii, A. S. Shaplov and D. Mecerreyes, *J. Polym. Sci. Part A: Polym. Chem.*, 2018, **56**, 714-723.
5. P. Sharma, D. Damien, K. Nagarajan, M. M. Shaijumon and M. Hariharan, *J. Phys. Chem. Lett.*, 2013, **4**, 3192-3197.
6. Y. Zhang, Y. Huang, G. Yang, F. Bu, K. Li, I. Shakir and Y. Xu, *ACS Appl. Mater. Interfaces*, 2017, **9**, 15549-15556.
